# Supplementary material
Source: Springer Nature journal article supplement (https://www.springermedizin.de/resource/supplementary/12245_2010_31_MOESM1_ESM.pdf/9672628)

Pseudochoolinesterase level during hospitalisation

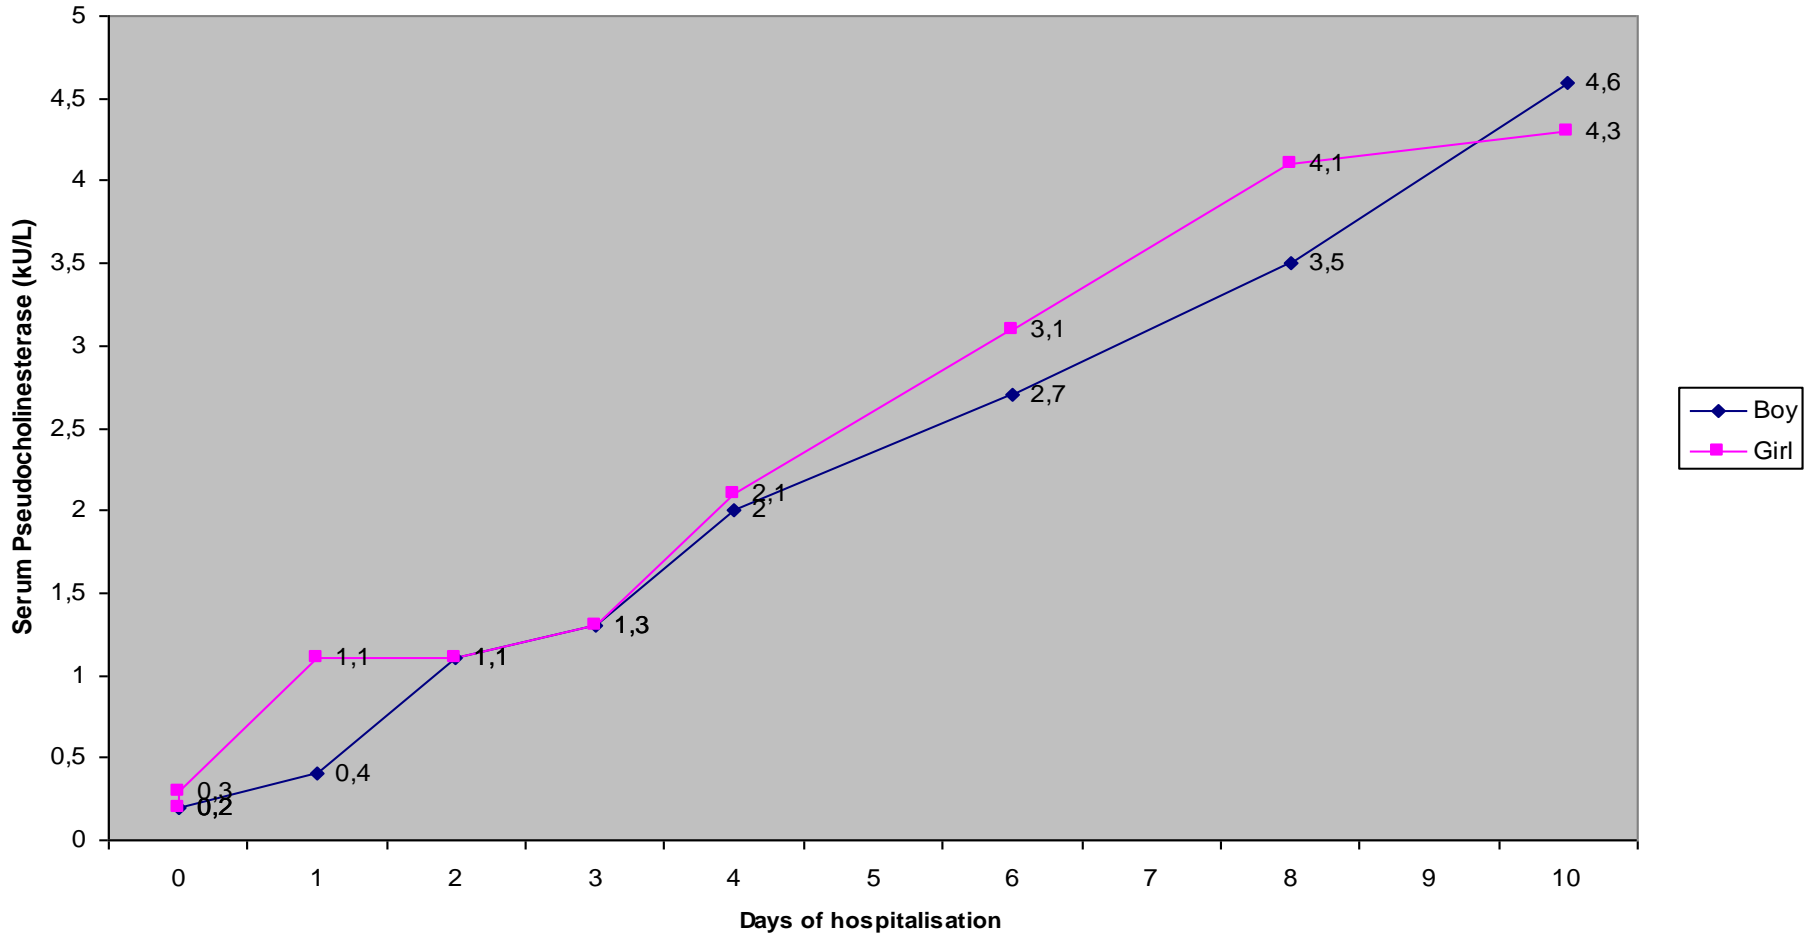

Supplement: MOESM1 [file 9672628]
